# Supplementary material for: CdSe (quantum dots)–graphene oxide system for thiophene polymerization: a new strategy, a new material
Source: Royal Society of Chemistry journal article supplement (doi:10.1039/c6ra00274a), 2016-01-01
Supplement: c6ra00274a1.pdf [file c6ra00274a1.pdf]

# CdSe (quantum dots)-Graphene Oxide system for thiophene polymerization: A new strategy, a new material

Edina Rusen<sup>1\*</sup>, Aurel Diacon<sup>1</sup>, Alexandra Mocanu<sup>1</sup>, Raluca Gavrila<sup>2</sup>, Leona Cristina Nistor<sup>3</sup>, Adrian Dinescu<sup>2</sup>

<sup>1</sup> University Politehnica of Bucharest, Department of Bioresources and Polymer Science, 1- 7 Gh. Polizu Street, 011061 Bucharest, Romania

<sup>2</sup>National Institute for Research and Development in Microtechnologies (IMT-Bucharest), 126 A, Erou Iancu Nicolae Street, P.O. Box 38-160, 023573 Bucharest, Romania

<sup>3</sup>National Institute of Materials Physics, 105 bis Atomistilor, 077125 Magurele-Ilfov, Romania.

## Supporting Information

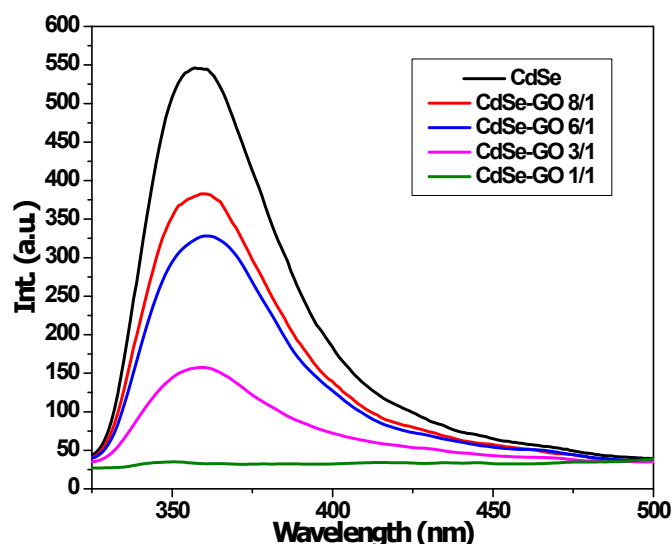

**Fig. S1:** Fluorescence emission modification depending on the CdSe/GO ratio

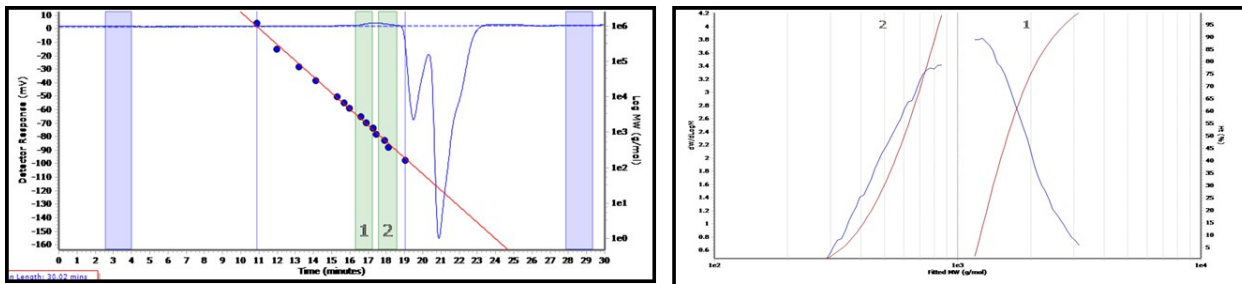

| Peak   | Mn   | Mw   | D     |
|--------|------|------|-------|
| Peak 1 | 1629 | 1738 | 1.067 |
| Peak 2 | 552  | 598  | 1.083 |

**Fig. S2:** GPC analysis of the species sample obtained after 100 min reaction time

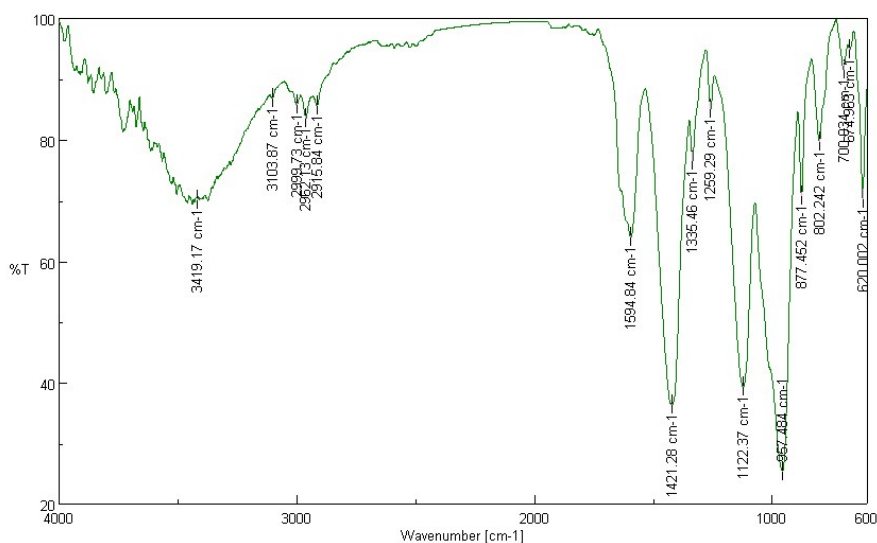

**Fig. S3:** FTIR analysis for polythiophen in the presence of GO

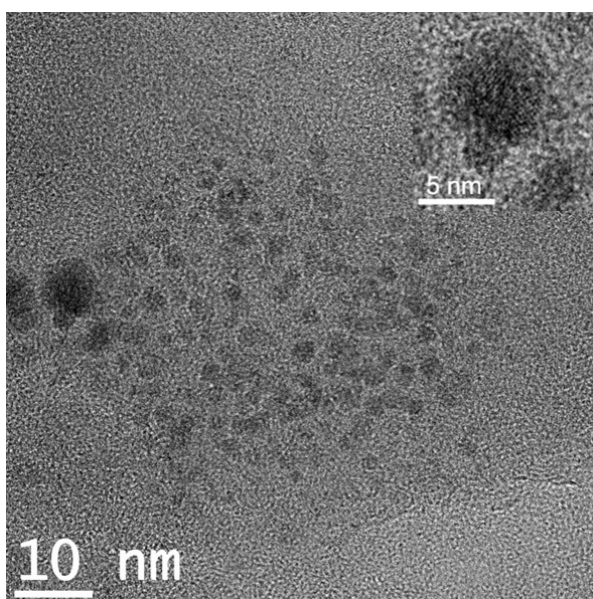

**Fig. S4** HRTEM image of very small crystalline CdSe nanoparticles embedded in the amorphous polythiophene. Their average size is approximately 2 nm. Only the larger ones (inset) show atomic resolution. For the smaller ones the contrast is disturbed by the too thick

amorphous layers (polythiophene plus C-grid bar). At the bottom right corner of the figure the edge of the polythiophene layer is visible.

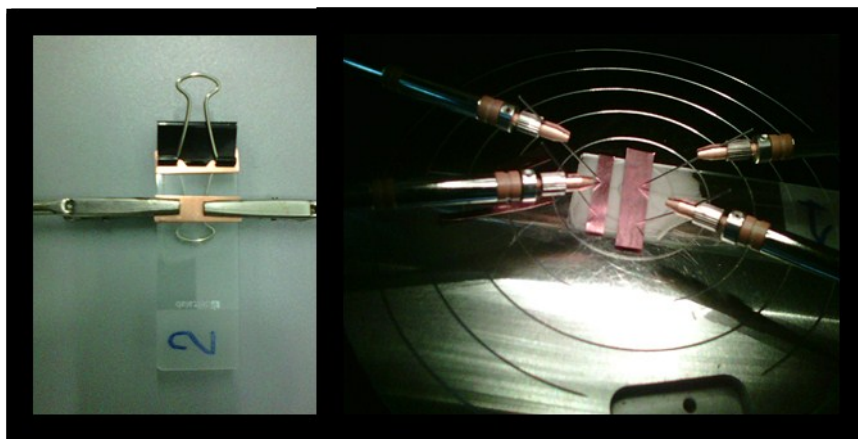

**Fig. S5:** Experimental setup for I-V curve generation

Electrodes prepared from soft and flexible copper foil were pressed and tightly clamped in a parallel configuration onto the glass slide supporting the films. Different types of foil and clamping systems have been tried so as to provide the best electrical contact.
